# Supplementary material
Source: PubMed Central journal article supplement (PMC3813961)
Supplement: NIHMS522468-supplement-1_si_001.pdf [file NIHMS522468-supplement-1_si_001.pdf]

## Supporting Information

B.D. Zoltowski, L.B. Motta-Mena and K.H. Gardner

“Blue-light induced dimerization of a bacterial LOV-HTH DNA-binding protein”

a.

| Name    | DNA sequence                                                  |
|---------|---------------------------------------------------------------|
|         | Consensus: <u>RGNCYWWRGNCY</u>                                |
| AN-45   | GGCCCCGAGGTCCAGCACCAACGCAGT <b><u>CCCCTTTGGTAC</u></b> GCCGAC |
| AN-35   | CGAGGTCCAGCACCAACGCAGT <b><u>CCCCTTTGGTAC</u></b> G           |
| AN-25   | TCCAGCACCAACGCAGT <b><u>CCCCTTTG</u></b>                      |
| AN-20   | AGCACCAACGCAGT <b><u>CCCCTT</u></b>                           |
| AN-15   | CACCAACGCAGT <b><u>CCC</u></b>                                |
| Clone-1 | TCTACGTTATAGGT <b><u>AGCCTTTAGTCC</u></b> ATGCTGATTCGTTTTCAAC |

b.

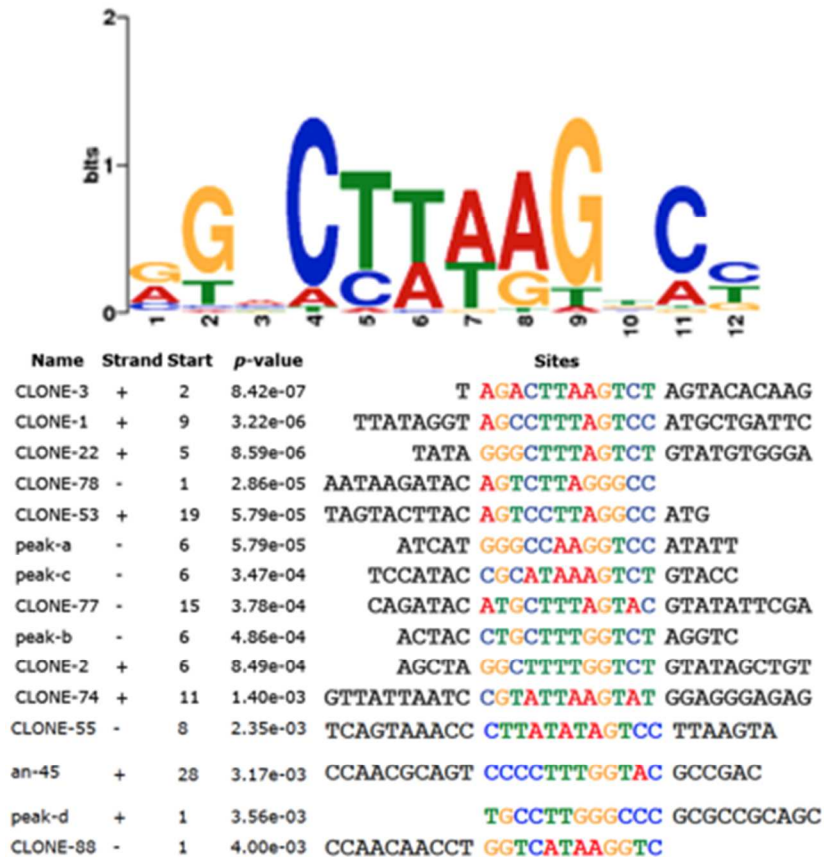

**Figure S1. Mapping of the canonical EL222-binding motif within the AN-45 DNA.** (a) List of the DNA sequences used in the present study. The previously-identified DNA consensus sequence for EL222 [3] consists of two binding half-sites (underlined) and is shown in bold in

each of the DNA sequences. Only the forward strand is shown; R= A/G, N= any base, Y= C/T, W= A/T. **(b)** Using the sequence analysis tool MEME [4], we searched for the EL222-specific DNA motif within the AN-45 DNA and the previously identified EL222 target sequences [3]. Both the sequence logo and sequence alignment results are shown. We note that the EL222 binding site in AN-45 varies in several positions from the established consensus and the highest affinity DNA Clone-1. We predict this contributes to the ~20-fold difference in affinity between AN-45 ( $EC_{50}$ = 5-7  $\mu$ M) and Clone-1 ( $EC_{50}$ = 0.3  $\mu$ M).

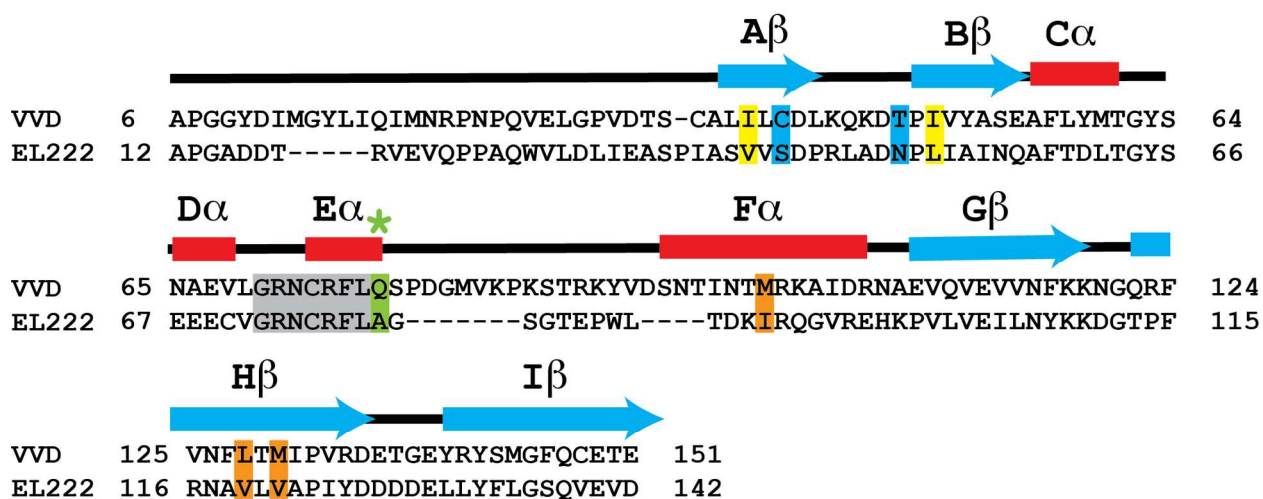

**Figure S2. Sequence alignment of EL222 and VVD.** Residues affecting the dark-state recovery rate in VVD [1] are highlighted; rate-accelerating (yellow) and slowing (orange) were considered for substitution. An additional residue, a conserved “Q” near the photochemically-triggered cysteine (green star), was also targeted for substitution. Residues in blue are flavin-interacting residues with negligible contributions to dark state recovery rates in other LOV proteins [1].

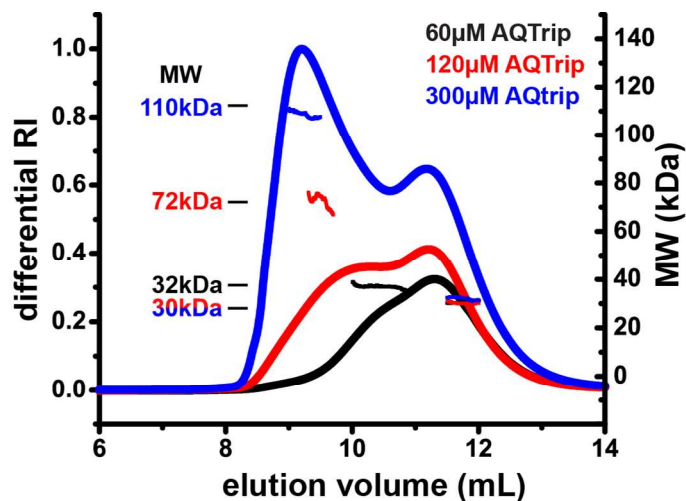

**Figure S3. SEC-MALLS of light-state AQTrip reveals a concentration-dependent oligomeric state.** SEC-MALLS data show that light-state AQTrip increases in MW with increasing concentration, going from a monomer at 60  $\mu\text{M}$  (black) to a dimer and tetramer as concentration increased to 120  $\mu\text{M}$  (red) and 300  $\mu\text{M}$  (blue). MW measurements are provided from the midpoint of the MALLS traces shown.

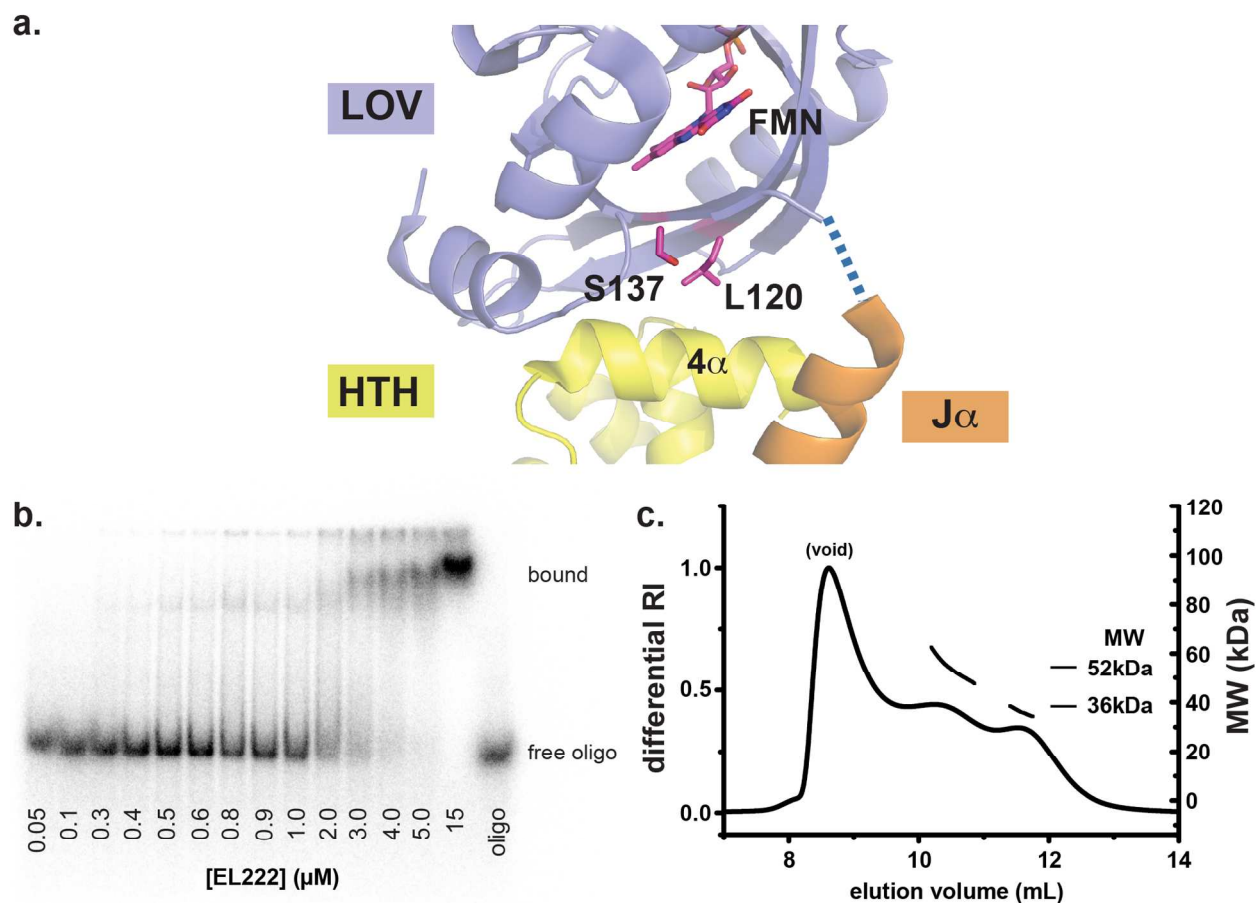

**Figure S4. The S137Y LOV/HTH-disruption variant forms a protein dimer that constitutively binds DNA in the dark.** (a) Both L120 and S137 lie on the LOV  $\beta$ -sheet, adjacent to the HTH domain  $4\alpha$  helix. (b) A dark-state EMSA of S137Y shows that the S137Y variant shifts the  $^{32}\text{P}$ -labeled AN-45 oligo indicative of DNA-binding. Interestingly, the mutant's apparent binding affinity is slightly higher than WT EL222 ( $\text{EC}_{50} \sim 2\text{-}3 \mu\text{M}$  for S137Y vs.  $\text{EC}_{50} \sim 7\text{-}8 \mu\text{M}$  for WT [2]). (c) SEC-MALLS indicates S137Y exists as a monomer:dimer mixture at  $40 \mu\text{M}$  under dark-state conditions. A large aggregate peak reflects some thermal instability in this variant (labeled as void). MW measurements are provided from the midpoint of the MALLS trace shown.

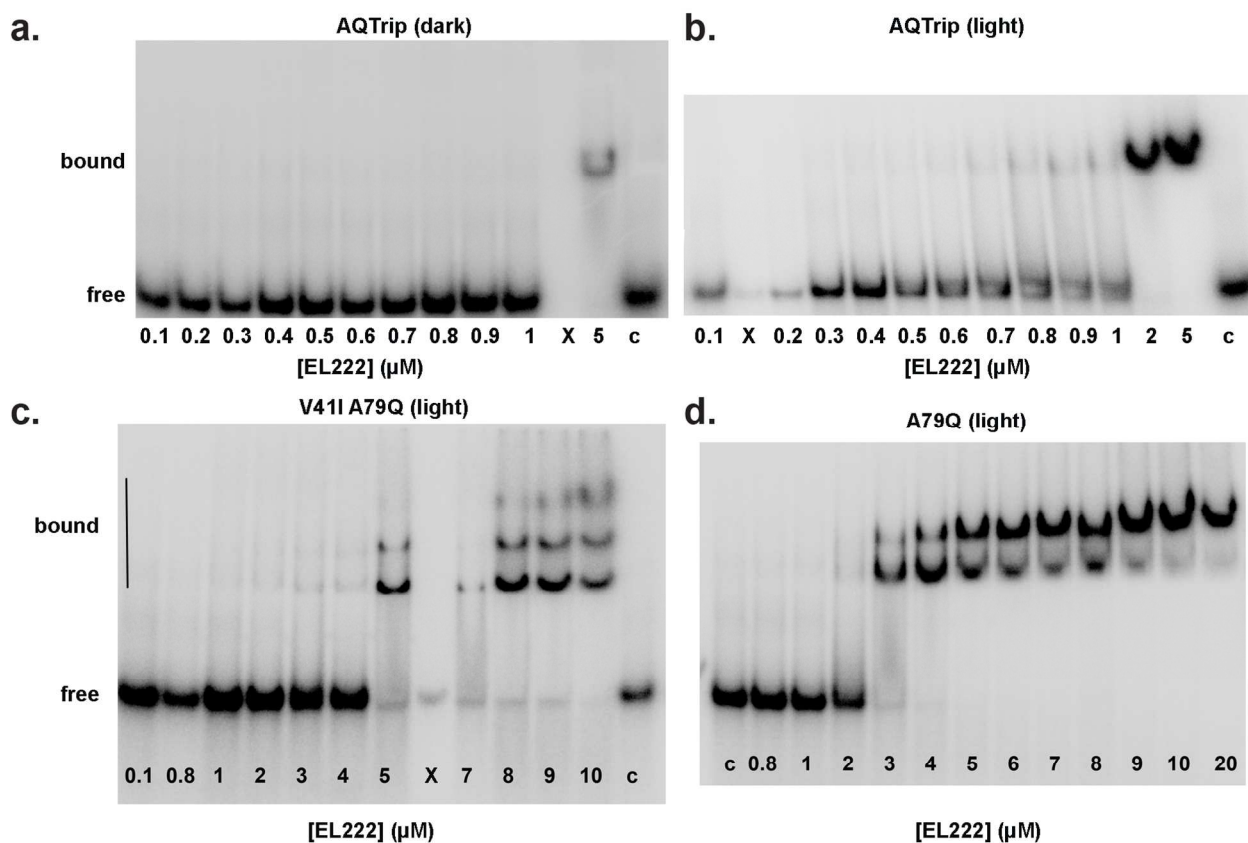

**Figure S5.. EMSA analysis reveals the DNA-binding capabilities of EL222 variants.** (a, b) EMSA analyses of the AQTrip variant. Dark-state samples (a) do not bind AN-45 DNA at or below 1  $\mu\text{M}$ ; however shifted bound-state bands are observed starting at  $\sim 0.7 \mu\text{M}$  under light conditions (b). (c) The V41I:A79Q variant binds DNA starting at  $\sim 2 \mu\text{M}$  under illumination, populating several bound species that suggest some additional cooperativity compared to WT. (d) A79Q binds DNA beginning at 2  $\mu\text{M}$ , and shows fewer supershifted bands compared to V41I:A79Q. All variants elicit higher apparent binding affinities compared to WT ( $EC_{50} \sim 8 \mu\text{M}$  [2]) and also have the potential to form additional higher-order protein/DNA complexes. Lanes marked with a “c” did not contain any protein; lanes marked with an “X” did not contain any DNA or protein.

**References:**

1. Zoltowski, B.D., B. Vaccaro, and B.R. Crane, *Mechanism-based tuning of a LOV domain photoreceptor*. Nat Chem Biol, 2009. **5**(11): p. 827-34.
2. Nash, A.I., et al., *Structural basis of photosensitivity in a bacterial light-oxygen-voltage/helix-turn-helix (LOV-HTH) DNA-binding protein*. Proc Natl Acad Sci U S A, 2011. **108**: p. 9449-9454.
3. Rivera-Cancel, G., L.B. Motta-Mena, and K.H. Gardner, *Identification of natural and artificial DNA substrates for light-activated LOV-HTH transcription factor EL222*. Biochemistry, 2012. **51**(50): p. 10024-34.
4. Bailey, T.L., et al., *MEME SUITE: tools for motif discovery and searching*. Nucleic Acids Res, 2009. **37**(Web Server issue): p. W202-8.
